# Supplementary material for: A novel salt-tolerant chitobiosidase discovered by genetic screening of a metagenomic library derived from chitin-amended agricultural soil
Source: PubMed Central journal article supplement (PMC4561078; doi:10.1007/s00253-015-6639-5), 2015-06-04
Supplement: 253_2015_6639_MOESM1_ESM.pdf [file 253_2015_6639_MOESM1_ESM.pdf]

## Supplementary material

### Applied Microbiology and Biotechnology

*A novel salt-tolerant chitobiosidase discovered by genetic screening of a metagenomic library derived from chitin-amended agricultural soil*

Mariana Silvia Cretoiu<sup>1,2</sup>, Francesca Berini<sup>3</sup>, Anna Maria Kielak<sup>4</sup>, Flavia Marinelli<sup>3</sup>, Jan Dirk van Elsas<sup>1</sup>

<sup>1</sup>Department of Microbial Ecology, CEES, University of Groningen Groningen, The Netherlands

<sup>2</sup>Department of Marine Microbiology, Royal Netherlands Institute for Sea Research, Yerseke, The Netherlands

<sup>3</sup>Department of Biotechnology and Life Sciences, University of Insubria, and “The Protein Factory” Research Center, Politecnico of Milano, ICRM CNR Milano and University of Insubria, Varese, Italy

<sup>4</sup>Department of Microbial Ecology, The Netherlands Institute of Ecology (NIOO), Wageningen, The Netherlands

Corresponding author: Jan Dirk van Elsas (j.d.van.elsas@rug.nl)

## Supplementary figures

**Figure S1:** Western blot analysis of *E. coli* BL21 Star<sup>TM</sup>(DE3) cells carrying pET24b(+) or pET24b(+>::53D1 plasmids, grown in LB medium for 2 h at 37°C after induction

**Figure S2:** 53D1 expression levels in *E. coli* BL21 Star<sup>TM</sup>(DE3)/pET24b(+>::53D1 recombinant strain

**Figure S3:** 53D1 expression levels in *E. coli* BL21 Star<sup>TM</sup>(DE3)/pCOLDI::53D1 recombinant strain

## Supplementary tables

**Table S1:** Fosmid functional annotation criteria

**Table S2:** Fosmid characteristics

**Table S3:** Complete annotation of five selected fosmids carrying *chiA*-like genes  
A. 14A; B. 22G3; C. 28C5; D. 53D1; E. 101F8

## 53DI chitinase gene expression

### Materials and Methods

Protein expression experiments were conducted in Luria Bertani (LB) and Terrific Broth (TB), both purchased from Sigma-Aldrich, St Louis, USA. Starter cultures were prepared from a single recombinant *Escherichia coli* colony in 10 ml LB medium grown overnight at 37°C and 200 rpm. Buffled 500 ml Erlenmeyer flasks containing 100 ml of cultivation medium were inoculated with the starter culture (initial OD<sub>600nm</sub> = 0.1) and further incubated as before. In the case of *E. coli* BL21 Star<sup>TM</sup>(DE3) cells transformed with either pColdI::53DI or pET24b(+):53DI vectors, protein expression was induced adding 0.5 mM IPTG to cells in the early-exponential growth phase (OD<sub>600nm</sub> ~0.6 in LB, ~1.0 in TB). After induction, *E. coli* BL21 Star<sup>TM</sup>(DE3)/pColdI::53DI cells were cultured at 15°C and 200 rpm according to manufacturer's instructions, while *E. coli* BL21 Star<sup>TM</sup>(DE3)/pET24b(+):53DI cells were incubated at 37°C or 25°C and 200 rpm. Cells were harvested at regular time intervals by centrifugation (1,900 x *g* for 30 min) at 4°C. Supernatants (i.e., the cell-free fermentation broths) were treated with 10% v/v trichloroacetic acid. Cell pellets were instead sonicated on ice (3-5 cycles of 30 sec each, with a 30-sec interval, using a Branson Sonifier 250, Danbury, USA) in Phosphate Buffer Saline (PBS) pH 7.3 containing 10 µg/ml deoxyribonuclease (DNase, Sigma-Aldrich, St Louis, USA), 0.19 mg/ml phenylmethylsulfonylfluoride (PMSF, Sigma-Aldrich, St Louis, USA) and 0.7 mg/ml pepstatin (Sigma-Aldrich, Str Louis, USA). Soluble and insoluble fractions were then separated by centrifugation (20,000 x *g* for 40 min) at 4°C. Insoluble fractions (containing membrane and inclusion bodies) were re-suspended in a volume of PBS equal to the corresponding cytoplasmic soluble fraction (2-3 ml per gram of cells) for successive analyses. Protein concentration was determined by Biuret assay (Gornall et al. 1949). Chitinase production was estimated through densitometric analysis of SDS gel bands with the software Quantity One (Bio-Rad Laboratories, Hercules, USA) and His<sub>6</sub>-glycin oxidase (His<sub>6</sub>-GO) from *Bacillus subtilis* gently provided by Loredano Pollegioni, University of Insubria (Job et al. 2002) as a standard. Chitinase activity was measured by the fluorimetric assay on 4-MU-(GlcNAc)<sub>2</sub> (Hjort et al. 2014).

### Results

Basal expression was performed with *E. coli* BL21 Star<sup>TM</sup>(DE3)/pET24b(+):53DI in LB cultures, adding 0.5 mM IPTG when OD<sub>600nm</sub> reached 0.6 and collecting cells after an additional 2 h of growth at 37°C. Using these conditions, most of the recombinant protein, corresponding to a band of 44.7 kDa, accumulated in insoluble fractions, being a low amount of protein detectable in the

soluble fraction (Supplementary Fig. S1). Protein was not found in medium fractions, nor in fractions collected from control *E. coli* BL21 Star<sup>TM</sup>(DE3) cells carrying the empty vector.

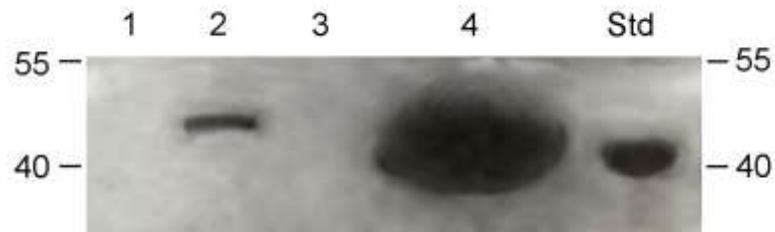

**Supplementary Figure S1. Western blot analysis of *E. coli* BL21 Star<sup>TM</sup>(DE3) cells carrying pET24b(+) or pET24b(+):53DI plasmids, grown in LB medium for 2 h at 37°C after induction.** From *E. coli* BL21 Star<sup>TM</sup>(DE3)/pET24b(+): soluble (lane 1) and insoluble (lane 3) fractions; from *E. coli* BL21 Star<sup>TM</sup>(DE3)/pET24b(+):53DI: soluble (lane 2) and insoluble (lane 4) fractions. In each lane, samples corresponding to 2 ml of cell culture were loaded. Std reference protein: His<sub>6</sub>-GO from *Bacillus subtilis* (10 µg, 42.66 kDa) gently provided by Loredano Pollegioni, University of Insubria (Job et al. 2002).

Chitinase activity assays revealed that the low amount of soluble protein in the above conditions was active (ca. 1 U per g of wet cells), whereas the insoluble form appeared inactive. Supplementary Figures S2a and b report the results from experiments conducted to increase the yield of active soluble 53D1 chitinase. Replacement of LB with the richer TB medium did not increase yield, whereas optimization of the expression conditions (i.e., incubating cells overnight at 25°C after IPTG addition) yielded up to 6 U of activity per g cells, even if >80% remained insoluble and inactive (Supplementary Fig. S2). When *E. coli* BL21 Star<sup>TM</sup>(DE3)/pColdI::53DI was used with the aim of increasing soluble protein at low-temperature, a protein corresponding to the expected molecular mass was detectable in the insoluble fractions and chitinase activity (ca. 4 U per g cells) was associated with the soluble form of the recombinant protein as reported for the pET24b(+) plasmid (Supplementary Fig. S3).

a

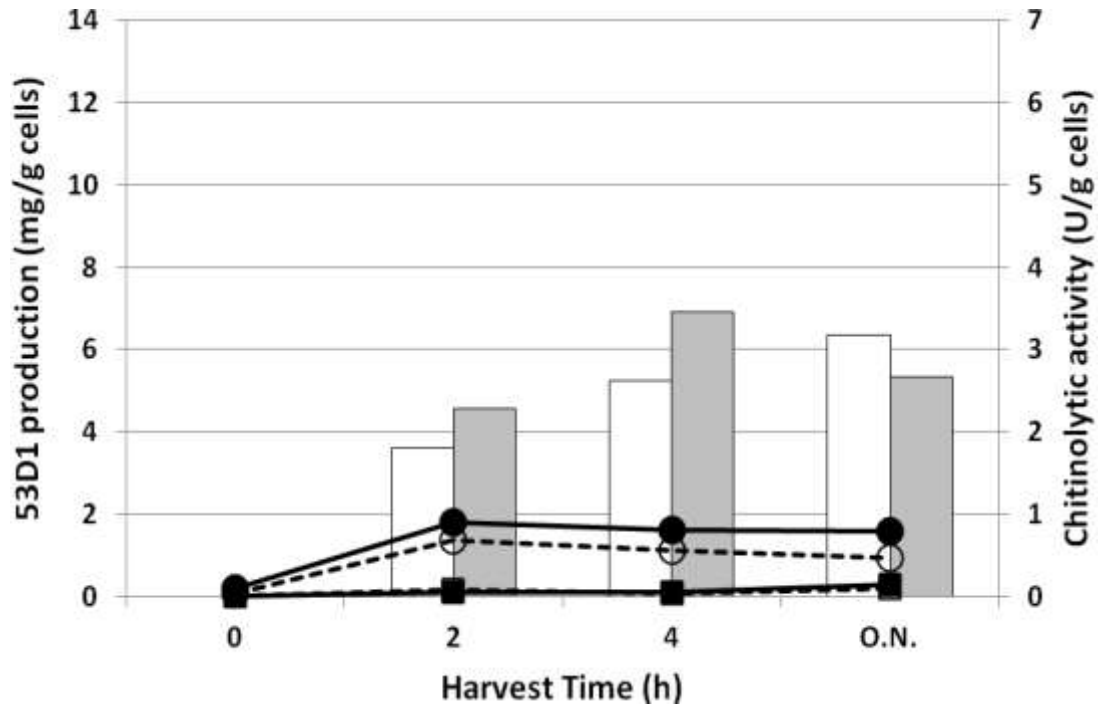

b

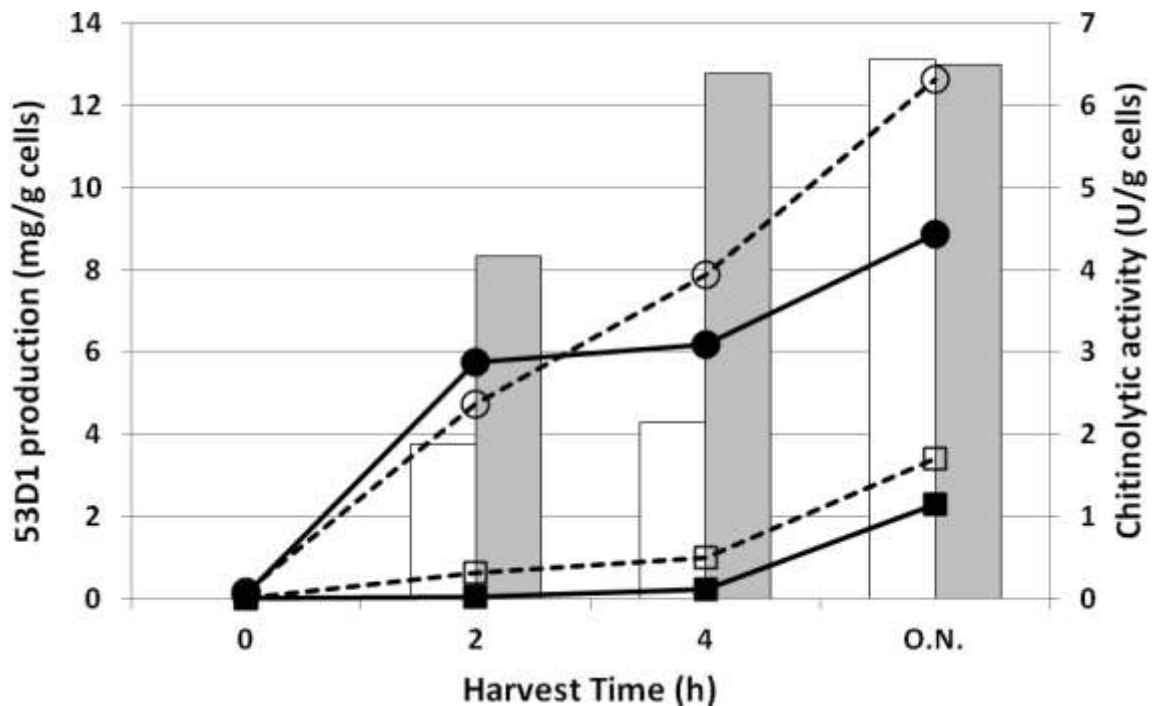

**Supplementary Figure S2. 53D1 expression levels in *E. coli* BL21 Star<sup>TM</sup>(DE3)/pET24b(+):53D1 recombinant strain.** The recombinant strain was incubated at 37°C (a) or 25°C (b) after induction with 0.5 mM IPTG and cells were harvested after 0, 2, 4 h and overnight (O.N.) from induction. 53D1 production into insoluble fractions (expressed as milligram of protein per gram of cells in wet weight) was determined by Western blot analysis using an anti-His-tag monoclonal antibody in cells

grown in LB (empty bars) or TB (grey bars). Chitinase activity was measured by fluorimetric assay on 4-MU-(GlcNAc)<sub>2</sub>, either in the soluble cytoplasmic fractions of cells grown in LB (○, dashed line) or TB (●, solid line) or in the insoluble fractions (membrane and inclusion bodies) of cells grown in LB (□, dashed line) or TB (■, solid line).

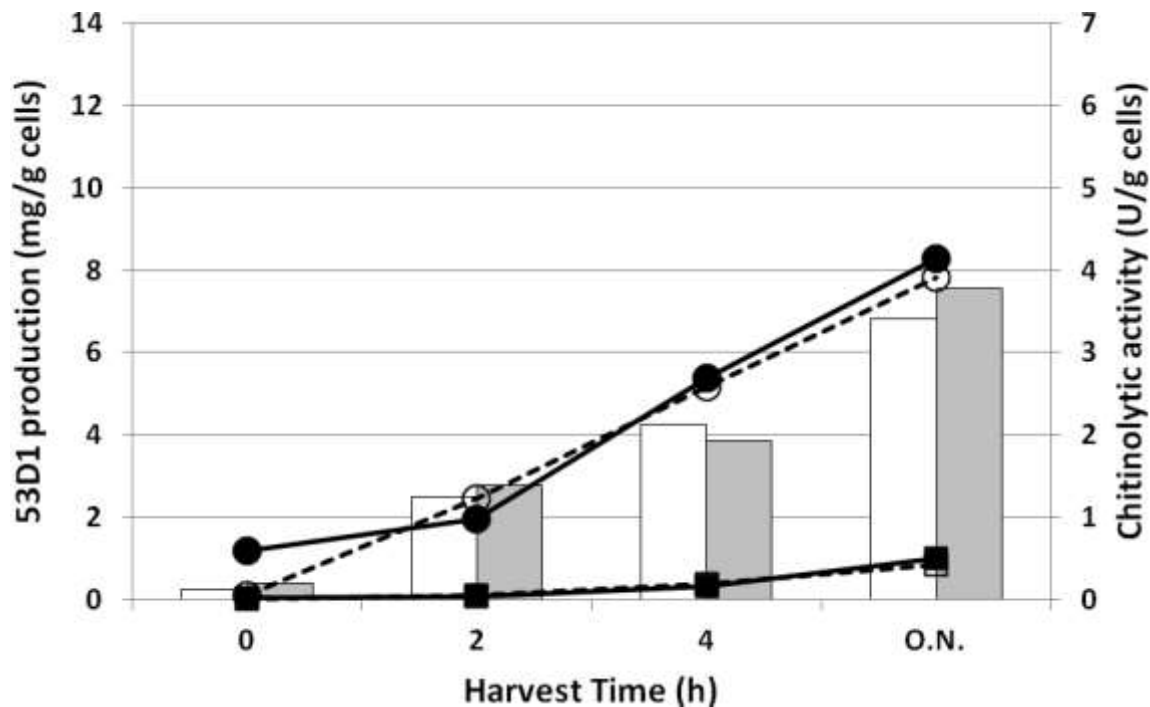

**Supplementary Figure S3. 53D1 expression levels in *E. coli* BL21Star™(DE3)/pCOLDI::53D1 recombinant strain.** The recombinant strain was incubated at 15°C after induction with 0.5 mM IPTG and cells were harvested after 0, 2, 4 h and overnight (O.N.) from induction. 53D1 production into insoluble fractions (expressed as milligram of protein per gram of cells in wet weight) was determined by Western blot analysis using anti-His-tag monoclonal antibody in cells grown in LB (empty bars) or TB (grey bars). Chitinase activity was measured by fluorimetric assay on 4-MU-(GlcNAc)<sub>2</sub>, either in the soluble cytoplasmic fractions of cells grown in LB (○, dashed line) or TB (●, solid line) or in the insoluble fractions (membrane and inclusion bodies) of cells grown in LB (□, dashed line) or TB (■, solid line).

## References

- Gornall AG, Bardawill CJ, David MM (1949) Determination of serum proteins by means of the biuret reaction. *J Biol Chem* 177:751-766
- Job V, Marcone GL, Pilone MS, Pollegioni L (2002) Glycine oxidase from *Bacillus subtilis*. Characterization of a new flavoprotein. *J Biol Chem* 277:6985-6993

Hjort K, Presti I, Elväng A, Marinelli F, Sjöling S (2014) Bacterial chitinase with phytopathogen control capacity from suppressive soil revealed by functional metagenomics. *Appl Microbiol Biotechnol* 98:2819-2828

## Supplementary Tables

**Table S1:** Functional annotation criteria. (a) BLASTP settings according to protein size (amino acid residues); (b) BLASTP criteria used to validate the affiliation of ORFs to specific proteins

**a**

| <i>BLAST settings</i> | <i>Query size (amino acids residues)</i> |                       |                       |                        |
|-----------------------|------------------------------------------|-----------------------|-----------------------|------------------------|
|                       | <i>&gt;85 residues</i>                   | <i>50-85 residues</i> | <i>35-50 residues</i> | <i>&lt;35 residues</i> |
| Weight matrix         | BLOSUM* 62                               | BLOSUM 80             | PAM*70                | PAM30                  |
| Gap cost              | 11,1                                     | 10,1                  | 10,1                  | 9,1                    |
| Low complexity filter | on                                       | off                   | off                   | off                    |
| E value               | 10                                       | 10                    | 1000                  | 1000                   |
| Word size             | 3                                        | 3                     | 3 or 2                | 2                      |

\*BLOSUM= Bloks Substitution Matrix. Calculates sequence comparison with less than 62% (default) or 80% identity.

\*PAM=Point Accepted Mutation. Calculates sequence comparison based closely related proteins.

**b**

| <i>Query coverage (%)</i> | <i>Maximum identity (%)</i> | <i>Aligment scores (total &amp; maximum)</i> | <i>E-value</i> |
|---------------------------|-----------------------------|----------------------------------------------|----------------|
| 100%                      | 20-100%                     | best hit                                     | $<10^{-15}$    |
| 50%                       | 48-100%                     | best hit                                     | $<10^{-10}$    |
| 30%                       | 75-100%                     | best hit                                     | $<10^{-5}$     |



**Table S2.** General characteristics of genetic fragments recovered from chitin-amended soil fosmid library. (a) Sequence information; (b) Fosmid length, gaps, G+C%, predicted ORFs

**a**

| <i>Fosmid</i> | <i>Consensus length (bp)</i> | <i>Total read count</i> | <i>Single reads</i> | <i>Reads in pairs</i> | <i>Average coverage</i> |
|---------------|------------------------------|-------------------------|---------------------|-----------------------|-------------------------|
| 14A           | 22632                        | 7547953                 | 342043              | 7205910               | 5645,37                 |
| 22G3          | 21255                        | 8725007                 | 436681              | 8288326               | 6428                    |
| 28C5          | 31983                        | 6426283                 | 296701              | 6129582               | 47985,18                |
| 53D1          | 35473                        | 9639420                 | 29260               | 9610160               | 13743                   |
| 101F8         | 37907                        | 7863506                 | 14887               | 7535920               | 1367,57                 |

**b**

| <i>Fosmid</i> | <i>Length (bp)</i> | <i>Gaps</i> | <i>G+C%</i> | <i>ORFs</i>  |                         |                     |                |
|---------------|--------------------|-------------|-------------|--------------|-------------------------|---------------------|----------------|
|               |                    |             |             | <i>Total</i> | <i>Non-hypothetical</i> | <i>Hypothetical</i> | <i>Unknown</i> |
| 14A           | 22632              | 3           | 52,7        | 18           | 12                      | 6                   | 0              |
| 22G3          | 21255              | 1           | 58,8        | 19           | 11                      | 7                   | 1              |
| 28C5          | 31983              | 0           | 65,2        | 34           | 20                      | 14                  | 0              |
| 53D1          | 35473              | 1           | 54,6        | 34           | 22                      | 11                  | 1              |
| 101F8         | 37907              | 0           | 59,5        | 40           | 31                      | 9                   | 0              |

**Table S3a.** Annotation of fosmid 14APredicted source criteria:  $\geq 50\%$  of the best hit to one genus

| <i>CDS</i> | <i>Locus</i> | <i>Gene length</i> | <i>Predicted protein (size - aminoacids, aa)</i>    | <i>Best match accession no.</i> | <i>Best hit to a protein from</i>          | <i>Query cover (%)</i> | <i>E-value</i> | <i>Identity (%)</i> |
|------------|--------------|--------------------|-----------------------------------------------------|---------------------------------|--------------------------------------------|------------------------|----------------|---------------------|
| 1          | 1203-544     | 660                | hypothetical protein (219 aa)                       | ZP_02433069                     | <i>Clostridium scindens</i> ATCC 35704     | 43                     | 0,22           | 42                  |
| 2          | 1422-1769    | 348                | hypothetical protein / phage integrase (115 aa)     | ZP_06661375                     | <i>Escherichia coli</i> B088               | 84                     | 2E-47          | 30                  |
| 3          | 3164-3919    | 756                | replication initiation protein (251 aa)             | NP_061424                       | <i>Escherichia coli</i> K-12               | 47                     | 7E-05          | 55                  |
| 4          | 4507-5673    | 1167               | plasmid-partitioning protein ParA (388 aa)          | NC_010804                       | <i>Burkholderia multivorans</i> ATCC 17616 | 76                     | 0.002          | 44                  |
| 5          | 5673-6644    | 972                | plasmid-partitioning protein ParB (323 aa)          | NP_061426                       | <i>Burkholderia pseudomallei</i> 1710b     | 50                     | 0,95           | 36                  |
| 6          | 6774-7559    | 786                | efflux ABC transporter, permease protein (261 aa)   | ZP_02505309                     | <i>Burkholderia pseudomallei</i> BCC215    | 94                     | 2E-45          | 27                  |
| 7          | 7559-9952    | 2394               | beta-D-galactosidase (797 aa)                       | YP_002928937                    | <i>Escherichia coli</i> BW2952             | 39                     | 7E-12          | 63                  |
| 8          | 10028-10216  | 189                | hypothetical protein (62 aa)                        | ZP_14290605                     | <i>Klebsiella pneumoniae</i> DSM 30104     | 93                     | 0,18           | 50                  |
| 9          | 11480-11019  | 462                | hypothetical protein (153 aa)                       | ZP_02068759                     | <i>Bacteroides uniformis</i> ATCC 8492     | 36                     | 1,3            | 38                  |
| 10         | 11606-13303  | 1698               | putative endochitinase (565 aa)                     | YP_004905998                    | <i>Kitasatospora setae</i> KM-6054         | 99                     | 0.0            | 99                  |
| 11         | 13580-13927  | 348                | phage integrase family protein (115 aa)             | CP001408                        | <i>Burkholderia pseudomallei</i> MSHR346   | 91                     | 8E-26          | 46                  |
| 12         | 15322-16077  | 756                | replication initiation protein (251 aa)             | AM747720                        | <i>Burkholderia cenocepacia</i> J2315      | 98                     | 5E-11          | 44                  |
| 13         | 16665-17831  | 1167               | plasmid-partitioning protein (388 aa)               | NC_016590                       | <i>Burkholderia</i> sp. YI23               | 99                     | 5E-41          | 39                  |
| 14         | 17831-18802  | 972                | hypothetical protein (323 aa)                       | NP_061426                       | <i>Burkholderia pseudomallei</i> K96243    | 17                     | 9,8            | 82                  |
| 15         | 18932-19717  | 786                | efflux ABC transporter, permease protein (261 aa)   | NC_007952                       | <i>Burkholderia xenovorans</i> LB400       | 99                     | 1E-63          | 36                  |
| 16         | 19717-20103  | 387                | beta-mannosidase (128 aa)                           | NC_010943                       | <i>Stenotrophomonas maltophilia</i> K279a  | 94                     | 2E-81          | 68                  |
| 17         | 20111-22108  | 1998               | putative sugar ABC transporter ATP-binding (665 aa) | AM747720                        | <i>Burkholderia cenocepacia</i> J2315      | 97                     | 9E-17          | 54                  |
| 18         | 22184-22372  | 189                | hypothetical protein / phage integrase (62 aa)      | ZP_06661375                     | <i>Escherichia coli</i> B088               | 39                     | 7E-12          | 63                  |

\*Predicted source: *Burkholderia*-like bacteria (50% of CDS)

**Table S3b.** Annotation of fosmid 22G3Predicted source criteria:  $\geq 50\%$  of the best hit to one phylum

| <i>CDS</i> | <i>Locus</i> | <i>Gene length</i> | <i>Predicted protein (size - aminoacids, aa)</i>                 | <i>Best match accession no.</i> | <i>Best hit to a protein from</i>                | <i>Query cover (%)</i> | <i>E-value</i> | <i>Identity (%)</i> |
|------------|--------------|--------------------|------------------------------------------------------------------|---------------------------------|--------------------------------------------------|------------------------|----------------|---------------------|
| 1          | 330-43       | 288                | hypothetical protein (95 aa)                                     | NC_008536                       | Candidatus <i>Solibacter usitatus</i>            | 86                     | 6,00E-05       | 29                  |
| 2          | 334-2412     | 2079               | ABC transporter (692 aa)                                         | YP_002977039                    | Candidatus <i>Koribacter versatilis</i> Ellin345 | 43                     | 4,00E-80       | 50                  |
| 3          | 2413-2550    | 138                | hypothetical protein, partial (45 aa)                            | WP_000469023                    | <i>Shigella flexneri</i>                         | 100                    | 5,00E-22       | 100                 |
| 4          | 2551-4638    | 2088               | chitinase (695 aa)                                               | YP_002753183                    | <i>Acidobacterium capsulatum</i> ATCC 51196      | 100                    | 0              | 100                 |
| 5          | 6727-7137    | 411                | hypothetical protein (136 aa)                                    | NP_286554                       | <i>Shigella flexneri</i>                         | 100                    | 7,00E-95       | 100                 |
| 6          | 7138-7899    | 762                | hypothetical protein (253 aa)                                    | NP_286553                       | <i>Escherichia coli</i> O157:H7 str. EDL933      | 100                    | 0              | 100                 |
| 7          | 7900-9141    | 1242               | cardiolipin synthetase (413 aa)                                  | NP_286552                       | <i>Escherichia coli</i>                          | 100                    | 0.0            | 100                 |
| 8          | 9142-10098   | 957                | conserved hypothetical protein (318 aa)                          | NC_012483                       | <i>Acidobacterium capsulatum</i> ATCC 51196      | 98                     | 6,00E-105      | 38                  |
| 9          | 10099-10812  | 714                | ABC transporter inner membrane protein (237 aa)                  | YP_593488                       | Candidatus <i>Koribacter versatilis</i> Ellin345 | 79                     | 5,00E-19       | 42                  |
| 10         | 10873-11517  | 645                | membrane protein (214 aa)                                        | YP_002754337                    | <i>Acidobacterium capsulatum</i> ATCC 51196      | 98                     | 6,00E-105      | 48                  |
| 11         | 11518-13539  | 2022               | excinuclease ABC subunit C (673 aa)                              | YP_005058066                    | <i>Granulicella mallensis</i> MP5ACTX8           | 59                     | 1,3            | 28                  |
| 12         | 13540-14595  | 1056               | <i>N</i> -Acetyl-D-glucosamine ABC transport system (351 aa)     | NC_012483                       | <i>Acidobacterium capsulatum</i> ATCC 51196      | 86                     | 4,00E-101      | 51                  |
| 13         | 14596-16314  | 1719               | putative bacterial extracellular solute-binding protein (572 aa) | NZ_ACCL02000054                 | <i>Bryantella formatexigens</i> DSM 14469        | 89                     | 2,00E-85       | 41                  |
| 14         | 16315-16581  | 267                | universal stress protein family protein (88 aa)                  | YP_002753605                    | <i>Acidobacterium capsulatum</i> ATCC 51196      | 97                     | 5,00E-28       | 32                  |
| 15         | 16582-18891  | 2310               | LuxR family transcriptional regulator (769 aa)                   | YP_004218938                    | <i>Granulicella tundricola</i> MP5ACTX9          | 78                     | 5,00E-38       | 33                  |
| 16         | 18892-19359  | 468                | unknown protein (155 aa)                                         | AEU38485                        | <i>Granulicella mallensis</i> MP5ACTX8           | 26                     | 1,00E-08       | 37                  |
| 17         | 19360-20541  | 1182               | hypothetical protein (393 aa)                                    | YP_003320526                    | <i>Sphaerobacter thermophilus</i> DSM 20745      | 79                     | 5,00E-19       | 42                  |
| 18         | 20542-20829  | 288                | hypothetical protein (95 aa)                                     | AFH22375                        | Environmental <i>Halophage</i> eHP-23            | 17                     | 9.2            | 82                  |
| 19         | 20830-21255  | 426                | non-ribosomal peptide synthetase (141 aa)                        | YP_007362971                    | <i>Myxococcus stipitatus</i> DSM 14675           | 36                     | 0.060          | 50                  |

\*Predicted source: *Acidobacteria*-like bacteria (60% of CDS)

**Table S3c.** Annotation of fosmid 28C5Predicted source criteria:  $\geq 50\%$  of the best hit to one phylum

| <i>CDS</i> | <i>Locus</i> | <i>Gene length</i> | <i>Predicted protein (size - aminoacids, aa)</i>        | <i>Best match accession no.</i> | <i>Best hit to a protein from</i>          | <i>Query cover (%)</i> | <i>E-value</i> | <i>Identity (%)</i> |
|------------|--------------|--------------------|---------------------------------------------------------|---------------------------------|--------------------------------------------|------------------------|----------------|---------------------|
| 1          | 1-1308       | 1308               | transcriptional regulator, LuxR family (435 aa)         | ZP_06974075                     | <i>Ktedonobacter racemifer</i> DSM 44963   | 98                     | 3E-31          | 41                  |
| 2          | 1309-1596    | 288                | hypothetical protein (95 aa)                            | CCF82402.1                      | <i>Nitrolancetus hollandicus</i> Lb        | 13                     | 2.8            | 56                  |
| 3          | 1597-2904    | 1308               | transcriptional regulator, LuxR family (435 aa)         | ZP_10243899                     | <i>Nitrolancetus hollandicus</i> Lb        | 99                     | 9E-54          | 36                  |
| 4          | 2905-3192    | 288                | hypothetical protein (95 aa)                            | CCF82296                        | <i>Nitrolancetus hollandicus</i> Lb        | 54                     | 7.2            | 28                  |
| 5          | 3193-4500    | 1308               | transcriptional regulator, LuxR family (435 aa)         | ZP_10243899                     | <i>Nitrolancetus hollandicus</i> Lb        | 99                     | 1E-63          | 36                  |
| 6          | 4501-5079    | 579                | conserved hypothetical protein (192 aa)                 | ZP_10243899                     | <i>Nitrolancetus hollandicus</i> Lb        | 94                     | 2E-81          | 68                  |
| 7          | 5080-6594    | 1515               | transposase IS4 family protein (504 aa)                 | ZP_06965924                     | <i>Ktedonobacter racemifer</i> DSM 44963   | 97                     | 9E-176         | 54                  |
| 8          | 6595-6966    | 372                | hypothetical protein (123 aa)                           | ZP_10246048                     | <i>Nitrolancetus hollandicus</i> Lb        | 39                     | 7E-12          | 63                  |
| 9          | 6967-7110    | 144                | hypothetical protein (47 aa)                            | ZP_10246047                     | <i>Nitrolancetus hollandicus</i> Lb        | 93                     | 0,18           | 50                  |
| 10         | 7111-7716    | 606                | transaldolase (201 aa)                                  | ZP_09746516                     | <i>Saccharomonospora cyanea</i> NA-134     | 36                     | 1,3            | 38                  |
| 11         | 7717-8142    | 426                | methyl-accepting chemotaxis sensory transducer (141 aa) | YP_001584157                    | <i>Burkholderia multivorans</i> ATCC 17616 | 43                     | 0,22           | 42                  |
| 12         | 8143-10098   | 1956               | hypothetical protein (651 aa)                           | YP_003371273                    | <i>Pirellula staleyi</i> DSM 6068          | 84                     | 2E-47          | 30                  |
| 13         | 10273-10530  | 258                | hypothetical protein (85 aa)                            | YP_006367565                    | <i>Modestobacter marinus</i>               | 47                     | 7E-05          | 55                  |
| 14         | 10531-10710  | 180                | hypothetical protein (59 aa)                            | CCF82297                        | <i>Nitrolancetus hollandicus</i> Lb        | 73                     | 1.3            | 44                  |
| 15         | 10717-11241  | 525                | hypothetical protein (174 aa)                           | ZP_21054152                     | <i>Xenococcus</i> sp. PCC 7305             | 50                     | 0,95           | 36                  |
| 16         | 11242-12987  | 1746               | hypothetical protein (581 aa)                           | WP_001567847                    | <i>Escherichia coli</i>                    | 94                     | 2E-45          | 27                  |
| 17         | 12988-13428  | 441                | dehydrogenase/reductase family oxidoreductase (146 aa)  | ZP_14469092                     | <i>Pseudomonas stutzeri</i> TS44           | 91                     | 8E-26          | 46                  |
| 18         | 13429-14631  | 1203               | dihydroorotase (400 aa)                                 | YP_003861823                    | <i>Maribacter</i> sp. HTCC2170             | 98                     | 5E-113         | 44                  |
| 19         | 14632-15312  | 681                | Zn-dependent hydrolase, glyoxylase (226 aa)             | ZP_18907840                     | <i>Leptolyngbya</i> sp. PCC 7375           | 99                     | 5E-41          | 39                  |

| <i>CDS</i> | <i>Locus</i> | <i>Gene length</i> | <i>Predicted protein (size - aminoacids, aa)</i>                | <i>Best match accession no.</i> | <i>Best hit to a protein from</i>             | <i>Query cover (%)</i> | <i>E-value</i> | <i>Identity (%)</i> |
|------------|--------------|--------------------|-----------------------------------------------------------------|---------------------------------|-----------------------------------------------|------------------------|----------------|---------------------|
| 20         | 15313-15492  | 180                | hypothetical protein (59 aa)                                    | CCF82291.1                      | <i>Nitrolancetus hollandicus</i> Lb           | 50                     | 1.2            | 25                  |
| 21         | 15493-17127  | 1635               | molecular chaperone GroEL (544 aa)                              | YP_001124352                    | <i>Geobacillus thermodenitrificans</i> NG80-2 | 95                     | 2E-80          | 36                  |
| 22         | 17128-18831  | 1704               | conserved hypothetical protein (567 aa)                         | CCF82397.1                      | <i>Nitrolancetus hollandicus</i> Lb           | 35                     | 1.0            | 24                  |
| 23         | 18832-20020  | 1188               | chitinase (395 aa)                                              | ZP_23766528                     | <i>Stenotrophomonas maltophilia</i> AU12-09   | 88                     | 2E-89          | 45                  |
| 24         | 20023-21288  | 1266               | hypothetical protein (421 aa)                                   | YP_003323291                    | <i>Thermobaculum terrenum</i> ATCC BAA-798    | 92                     | 5E-45          | 36                  |
| 25         | 21289-22386  | 1098               | ABC-type sugar transport system, ATP-binding component (365 aa) | ZP_10244076                     | <i>Nitrolancetus hollandicus</i> Lb           | 99                     | 1E-93          | 44                  |
| 26         | 22387-23088  | 702                | putative acetyltransferase (233 aa)                             | YP_004591376                    | <i>Enterobacter aerogenes</i> KCTC 2190       | 39                     | 3,6            | 31                  |
| 27         | 23089-24216  | 1128               | ABC transporter (375 aa)                                        | YP_003322712                    | <i>Thermobaculum terrenum</i> ATCC BAA-798    | 98                     | 3E-110         | 48                  |
| 28         | 24217-25341  | 1125               | putative ABC transporter (374 aa)                               | ZP_10245776                     | <i>Nitrolancetus hollandicus</i> Lb           | 43                     | 0.0002         | 25                  |
| 29         | 25342-26364  | 1023               | ABC-type sugar transport system, permease component (340 aa)    | ZP_14747165                     | <i>Rhizobium</i> sp. CF080                    | 97                     | 2E-49          | 24                  |
| 30         | 26365-27420  | 1056               | <i>N</i> -Acetyl-D-glucosamine ABC transport system (351 aa)    | YP_004961886                    | <i>Streptomyces bingchenggensis</i> BCW-1     | 85                     | 8E-55          | 25                  |
| 31         | 27478-29139  | 1662               | putative extracellular solute-binding protein (553 aa)          | ZP_06974409.1                   | <i>Ktedonobacter racemifer</i> DSM44963       | 42                     | 1.0            | 24                  |
| 32         | 29140-29406  | 267                | conserved hypothetical protein (88 aa)                          | ZP_10244518                     | <i>Nitrolancetus hollandicus</i> Lb           | 78                     | 0,019          | 35                  |
| 33         | 29407-31716  | 2310               | LuxR family transcriptional regulator (769 aa)                  | ZP_21980543                     | <i>Rhodococcus triatoniae</i> BKS 15-14       | 98                     | 7E-105         | 37                  |
| 34         | 31717-31983  | 267                | putative flavin-nucleotide-binding protein (88 aa)              | ZP_10012406                     | <i>Saccharomonospora glauca</i> K62           | 53                     | 0,0002         | 49                  |

\*Predicted source: *Chloroflexi*-like bacteria (53% of CDS; 38% of CDS similar to *Nitrolancetus hollandicus*)

**Table S3d.** Annotation of fosmid 53D1Predicted source criteria:  $\geq 50\%$  of the best hit to one phylum

| <i>CDS</i> | <i>Locus</i> | <i>Gene length</i> | <i>Predicted protein (size - aminoacids, aa)</i>           | <i>Best match accession no.</i> | <i>Best hit to a protein from</i>        | <i>Query cover (%)</i> | <i>E-value</i> | <i>Identity (%)</i> |
|------------|--------------|--------------------|------------------------------------------------------------|---------------------------------|------------------------------------------|------------------------|----------------|---------------------|
| 1          | 330-43       | 288                | transcriptional regulator, LuxR family (95 aa)             | ZP_06974075                     | <i>Ktedonobacter racemifer</i> DSM 44963 | 96                     | 1E-17          | 54                  |
| 2          | 334-1641     | 1308               | putative protein kinase/transcriptional regulator (435 aa) | ZP_10243899                     | <i>Nitrolancetus hollandicus</i> Lb      | 99                     | 9E-54          | 36                  |
| 3          | 1858-2436    | 579                | conserved hypothetical protein (192 aa)                    | ZP_10245859                     | <i>Nitrolancetus hollandicus</i> Lb      | 94                     | 3E-69          | 68                  |
| 4          | 2485-3999    | 1515               | transposase IS4 family protein (504 aa)                    | ZP_06965924                     | <i>Ktedonobacter racemifer</i> DSM 44963 | 97                     | 3E-171         | 53                  |
| 5          | 4733-4362    | 372                | unknown function (123 aa)                                  | YP_007149953                    | <i>Cylindrospermum stagnale</i> PCC 7417 | 100                    | 2E-16          | 38                  |
| 6          | 4935-4792    | 144                | transposase IS66 (47 aa)                                   | YP_578978                       | <i>Nitrobacter hamburgensis</i> X14      | 97                     | 1.0            | 43                  |
| 7          | 5968-5363    | 606                | putative DNA primase (201 aa)                              | ZP_06965534.1                   | <i>Ktedonobacter racemifer</i> DSM 44963 | 35                     | 1.0            | 24                  |
| 8          | 6636-6211    | 426                | non-ribosomal peptide synthetase (141 aa)                  | YP_007362971                    | <i>Myxococcus stipitatus</i> DSM 14675   | 30                     | 0.89           | 50                  |
| 9          | 8591-6636    | 1956               | conserved hypothetical protein (651 aa)                    | WP_008478050                    | <i>Nitrolancetus hollandicus</i> Lb      | 82                     | 9E-35          | 29                  |
| 10         | 8783-8956    | 174                | putative ABC-2 type transporter (57 aa)                    | ZP_10245593                     | <i>Nitrolancetus hollandicus</i> Lb      | 40                     | 6.0            | 28                  |
| 11         | 9306-9049    | 258                | hypothetical protein (85 aa)                               | YP_006367565                    | <i>Modestobacter marinus</i>             | 46                     | 6E-05          | 55                  |
| 12         | 9991-9461    | 531                | putative dehydrogenase (176 aa)                            | ZP_10245062                     | <i>Nitrolancetus hollandicus</i> Lb      | 10                     | 0.2            | 35                  |
| 13         | 11889-10144  | 1746               | hypothetical protein (581 aa)                              | WP_008071442                    | <i>Novosphingobium nitrogenifigens</i>   | 95                     | 5E-45          | 28                  |
| 14         | 12140-12580  | 441                | short chain dehydrogenase (146 aa)                         | ZP_10245022                     | <i>Nitrolancetus hollandicus</i> Lb      | 50                     | 0.002          | 26                  |
| 15         | 12580-13782  | 1203               | hypothetical protein (400 aa)                              | CCF_82392                       | <i>Nitrolancetus hollandicus</i> Lb      | 75                     | 0.045          | 30                  |
| 16         | 13838-14518  | 681                | beta-lactamase domain protein (226 aa)                     | ZP_10244249                     | <i>Nitrolancetus hollandicus</i> Lb      | 60                     | 1.0            | 26                  |
| 17         | 14546-14725  | 180                | putative hydrolase (59 aa)                                 | EFH90939                        | <i>Ktedonobacter racemifer</i> DSM 44963 | 51                     | 0,032          | 29                  |
| 18         | 14918-16552  | 1635               | putative chaperone protein DnaK (544 aa)                   | NC_013525                       | <i>Thermobaculum terrenum</i>            | 63                     | 0.005          | 32                  |
| 19         | 16569-18272  | 1704               | hypothetical protein (567 aa)                              | EFH90934                        | <i>Ktedonobacter racemifer</i> DSM 44963 | 56                     | 0.002          | 27                  |
| 20         | 18285-19475  | 1191               | chitinase (396 aa)                                         | BAF02588                        | uncultured bacterium                     | 94                     | 2E-109         | 48                  |
|            |              |                    |                                                            | ZP_23766528                     | <i>Stenotrophomonas maltophilia</i>      | 87                     | 1E-89          | 45                  |
|            |              |                    |                                                            | ZP_06970122                     | <i>Ktedonobacter racemifer</i> DSM 44963 | 93                     | 6E-81          | 41                  |

| <b>CDS</b> | <b>Locus</b> | <b>Gene length</b> | <b>Predicted protein (size - aminoacids, aa)</b>           | <b>Best match accession no.</b> | <b>Best hit to a protein from</b>          | <b>Query cover (%)</b> | <b>E-value</b> | <b>Identity (%)</b> |
|------------|--------------|--------------------|------------------------------------------------------------|---------------------------------|--------------------------------------------|------------------------|----------------|---------------------|
| 21         | 20756-19491  | 1266               | hypothetical protein (421 aa)                              | YP_003323291                    | <i>Thermobaculum terrenum</i> ATCC BAA-798 | 92                     | 5E-45          | 36                  |
| 22         | 21866-20769  | 1098               | ABC transporter (365 aa)                                   | YP_003323291                    | <i>Thermobaculum terrenum</i> ATCC BAA-799 | 98                     | 3E-97          | 45                  |
| 23         | 22572-21871  | 702                | hypothetical protein (233 aa)                              | CCF82422                        | <i>Nitrolancetus hollandicus</i> Lb        | 70                     | 8.0            | 27                  |
| 24         | 23705-22578  | 1128               | sugar ABC transporter ATP-binding protein (375 aa)         | YP_001637023                    | <i>Thermomicrobium roseum</i> DSM 5159     | 86                     | 4E-101         | 51                  |
| 25         | 24841-23717  | 1125               | sugar ABC transporter ATP-binding protein (374 aa)         | YP_002250459                    | <i>Dictyoglomus thermophilum</i> H-6-12    | 89                     | 2E-85          | 41                  |
| 26         | 25939-24917  | 1023               | binding-protein-dependent transport (340)                  | ZP_06975261                     | <i>Ktedonobacter racemifer</i> DSM 44963   | 97                     | 5E-28          | 32                  |
| 27         | 26997-25942  | 1056               | N acetyl-glucosamine transport (351 aa)                    | ZP_06975262                     | <i>Ktedonobacter racemifer</i> DSM 44964   | 78                     | 5E-38          | 33                  |
| 28         | 28770-27052  | 1719               | extracellular solute-binding protein (572 aa)              | YP_001635626                    | <i>Chloroflexus aurantiacus</i> J-10-fl    | 26                     | 1E-08          | 37                  |
| 29         | 28986-29252  | 267                | putative protein- glyoxylase (88 aa)                       | ZP_10246475                     | <i>Nitrolancetus hollandicus</i> Lb        | 40                     | 0.01           | 30                  |
| 30         | 29932-30129  | 198                | hypothetical protein (65 aa)                               | EFH90932                        | <i>Ktedonobacter racemifer</i> DSM 44963   | 52                     | 7.2            | 24                  |
| 31         | 30282-32591  | 2310               | putative Protein kinase/transcriptional regulator (769 aa) | ZP_10243899                     | <i>Nitrolancetus hollandicus</i> Lb        | 94                     | 4E-70          | 35                  |
| 32         | 32770-33237  | 468                | hypothetical protein (155 aa)                              | Q8ZY16                          | <i>Pyrobaculum aerophilum</i> str. IM2     | 65                     | 7,3            | 26                  |
| 33         | 33432-34613  | 1182               | NHL repeat containing protein (393 aa)                     | EFH90640                        | <i>Ktedonobacter racemifer</i> DSM 44963   | 80                     | 1E-02          | 35                  |
| 34         | 35343-35023  | 321                | conserved hypothetical protein (106 aa)                    | ZP_06588277                     | <i>Streptomyces roseosporus</i> NRRL       | 30                     | 5              | 48                  |

\*Predicted source: *Chloroflexi*-like bacteria (76% of CDS; 35% of CDS similar to *Nitrolancetus hollandicus* and 29% similar to *Ktedonobacter racemifer*)

**Table S3e.** Annotation of fosmid 101F8Predicted source criteria:  $\geq 50\%$  of the best hit to one phylum

| <i>CDS</i> | <i>Locus</i> | <i>Gene length</i> | <i>Predicted protein (size - aminoacids, aa)</i>                         | <i>Best match accession no.</i> | <i>Best hit to a protein from</i>           | <i>Query cover (%)</i> | <i>E-value</i> | <i>Identity (%)</i> |
|------------|--------------|--------------------|--------------------------------------------------------------------------|---------------------------------|---------------------------------------------|------------------------|----------------|---------------------|
| 1          | 208-1221     | 1014               | UDP-glucose 4-epimerase (337 aa)                                         | ZP_11085591                     | <i>Aeromonas veronii</i> AMC35              | 100                    | 0.0            | 99                  |
| 2          | 1792-1292    | 501                | hypothetical protein (166 aa)                                            | ZP_17191914                     | <i>Aeromonas veronii</i> AMC36              | 100                    | 4E-101         | 92                  |
| 3          | 1801-2922    | 1122               | chitinase (373 aa)                                                       | YP_005010140                    | <i>Niastella koreensis</i> GR20-10          | 100                    | 0.0            | 100                 |
| 4          | 3115-2885    | 231                | hypothetical protein (76 aa)                                             | ZP_11085592                     | <i>Aeromonas veronii</i> AMC35              | 84                     | 5E-37          | 100                 |
| 5          | 3283-4152    | 870                | polysaccharide deacetylase family protein (289 aa)                       | YP_004625545                    | <i>Thermodesulfatator indicus</i> DSM 15286 | 100                    | 0.0            | 100                 |
| 6          | 4244-5614    | 1371               | UDP- <i>N</i> -acetylmuramate ligase (456 aa)                            | ZP_11085593                     | <i>Aeromonas veronii</i> AMC35              | 100                    | 0.0            | 99                  |
| 7          | 5611-6222    | 612                | 3-octaprenyl-4-hydroxybenzoate decarboxylase UbiX (203 aa)               | YP_004391328                    | <i>Aeromonas veronii</i> B565               | 100                    | 5E-144         | 97                  |
| 8          | 6846-6295    | 552                | LitR, transcriptional regulator (183 aa)                                 | YP_004391327                    | <i>Aeromonas veronii</i> B565               | 100                    | 1E-123         | 93                  |
| 9          | 7111-7641    | 531                | hypoxanthine phosphoribosyltransferase (176 aa)                          | ZP_17187671                     | <i>Aeromonas veronii</i> AER39              | 100                    | 3E-123         | 98                  |
| 10         | 7753-8670    | 918                | ABC-type multidrug transporter (305 aa)                                  | ZP_12960923                     | <i>Aeromonas salmonicida</i> 01-B526        | 100                    | 0.0            | 96                  |
| 11         | 8667-9440    | 774                | ABC transporter permease (257 aa)                                        | YP_004391324                    | <i>Aeromonas veronii</i> B565               | 100                    | 5E-179         | 99                  |
| 12         | 9694-10113   | 420                | methylamine utilization protein-like protein (139 aa)                    | YP_004391321                    | <i>Aeromonas veronii</i> B565               | 100                    | 8E-75          | 96                  |
| 13         | 10118-10645  | 528                | hypothetical protein (175 aa)                                            | YP_004391320                    | <i>Aeromonas veronii</i> B566               | 100                    | 5E-124         | 98                  |
| 14         | 12104-10725  | 1380               | hypothetical protein (459 aa)                                            | ZP_17197498                     | <i>Aeromonas veronii</i> AER397             | 98                     | 0.0            | 96                  |
| 15         | 12599-12249  | 351                | antibiotic biosynthesis monooxygenase domain-containing protein (116 aa) | YP_004391318                    | <i>Aeromonas veronii</i> B565               | 100                    | 7E-80          | 99                  |
| 16         | 13481-12624  | 858                | pantothenate synthetase (285 aa)                                         | ZP_17187681                     | <i>Aeromonas veronii</i> AER39              | 100                    | 0.0            | 98                  |
| 17         | 14523-13729  | 795                | 3-methyl-2-oxobutanoate hydroxymethyltransferase (264 aa)                | YP_004391316                    | <i>Aeromonas veronii</i> B565               | 100                    | 0.0            | 99                  |
| 18         | 15029-14520  | 510                | putative pyrophosphokinase (169 aa)                                      | YP_004391315                    | <i>Aeromonas veronii</i> B565               | 100                    | 5E-98          | 96                  |
| 19         | 16471-15041  | 1431               | poly(A) polymerase (476 aa)                                              | YP_858006                       | <i>Aeromonas hydrophila</i> ATCC 7966       | 95                     | 0.0            | 95                  |
| 20         | 17513-16719  | 795                | glutamyl-queuosine tRNA(Asp) synthetase (264 aa)                         | ZP_11085610                     | <i>Aeromonas veronii</i> AMC35              | 100                    | 1E-176         | 93                  |



| <b>CDS</b> | <b>Locus</b> | <b>Gene length</b> | <b>Predicted protein (size - aminoacids, aa)</b>             | <b>Best match accession no.</b> | <b>Best hit to a protein from</b>       | <b>Query cover (%)</b> | <b>E-value</b> | <b>Identity (%)</b> |
|------------|--------------|--------------------|--------------------------------------------------------------|---------------------------------|-----------------------------------------|------------------------|----------------|---------------------|
| 21         | 18188-17739  | 450                | RNA polymerase-binding protein DksA (149 aa)                 | YP_858004                       | <i>Aeromonas hydrophila</i> ATCC 7966   | 100                    | 2E-100         | 95                  |
| 22         | 19051-18326  | 726                | sugar fermentation stimulation protein (241 aa)              | ZP_11085612                     | <i>Aeromonas veronii</i> AMC35          | 100                    | 3E-171         | 95                  |
| 23         | 19575-19048  | 528                | 2'-5' RNA ligase (polyribonucleotide synthase (ATP) (175 aa) | ZP_17191893                     | <i>Aeromonas veronii</i> AMC34          | 100                    | 2E-112         | 91                  |
| 24         | 19751-21049  | 1299               | ATP-dependent helicase HrpB (432 aa)                         | ZP_11085614                     | <i>Aeromonas veronii</i> AMC35          | 92                     | 0.0            | 97                  |
| 25         | 21080-21484  | 405                | chitinase (134 aa)                                           | NP_828094                       | <i>Streptomyces avermitilis</i> MA-4680 | 82                     | 9E-48          | 77                  |
| 26         | 21511-21786  | 276                | Na+/H+ antiporter (91 aa)                                    | ZP_10511762                     | <i>Bacillus mojavensis</i> RO-H-1       | 96                     | 2E-11          | 40                  |
| 27         | 21925-23136  | 1212               | ATP-dependent helicase HrpB (403 aa)                         | YP_004391309                    | <i>Aeromonas veronii</i> B565           | 100                    | 0.0            | 96                  |
| 28         | 23210-25525  | 2316               | penicillin-binding protein 1B (771 aa)                       | ZP_17187690                     | <i>Aeromonas veronii</i> AER39          | 100                    | 0.0            | 96                  |
| 29         | 25585-25986  | 402                | glyoxylase I family protein (133 aa)                         | YP_004391307                    | <i>Aeromonas veronii</i> B565           | 100                    | 1E-75          | 92                  |
| 30         | 26372-26052  | 321                | SMR family multidrug efflux pump (106 aa)                    | ZP_08521667                     | <i>Aeromonas caviae</i> Ae398           | 100                    | 6E-45          | 87                  |
| 31         | 26761-26360  | 402                | SMR family multidrug efflux pump (133 aa)                    | ZP_11388620                     | <i>Aeromonas aquariorum</i> AAK1        | 100                    | 8E-72          | 83                  |
| 32         | 26919-27800  | 882                | LysR family transcriptional regulator (293 aa)               | YP_001140693                    | <i>Aeromonas veronii</i> B565           | 100                    | 0.0            | 93                  |
| 33         | 27911-29491  | 1581               | putative sensory transduction protein (526 aa)               | YP_004391303                    | <i>Aeromonas veronii</i> B566           | 100                    | 0.0            | 96                  |
| 34         | 29698-30228  | 531                | inorganic pyrophosphatase (176 aa)                           | YP_001140672                    | <i>Aeromonas salmonicida</i> A449       | 100                    | 1E-125         | 99                  |
| 35         | 30604-30257  | 348                | hypothetical protein (115 aa)                                | ZP_17187697                     | <i>Aeromonas veronii</i> AER39          | 100                    | 1E-71          | 90                  |
| 36         | 30744-31634  | 891                | hypothetical protein (296 aa)                                | ZP_17191883                     | <i>Aeromonas veronii</i> AMC34          | 100                    | 0.0            | 91                  |
| 37         | 31855-32397  | 543                | hypothetical protein (180 aa)                                | ZP_11085624                     | <i>Aeromonas veronii</i> AMC35          | 100                    | 3E-123         | 97                  |
| 38         | 32442-32741  | 300                | hypothetical protein (99 aa)                                 | ZP_17187700                     | <i>Aeromonas veronii</i> AER39          | 100                    | 3E-59          | 89                  |
| 39         | 32773-33357  | 585                | hypothetical protein (194 aa)                                | YP_858026                       | <i>Aeromonas hydrophila</i> ATCC 7966   | 100                    | 1E-97          | 84                  |
| 40         | 33362-34051  | 690                | antimicrobial peptide ABC transporter (229 aa)               | YP_004391296                    | <i>Aeromonas veronii</i> B565           | 100                    | 5E-158         | 97                  |

\*Predicted source: *Aeromonas*-like bacteria (90% of CDS)
